# Supplementary material
Source: PubMed Central journal article supplement (PMC6092619)
Supplement: EMBJ-37-e99264-s002.pdf [file EMBJ-37-e99264-s002.pdf]

## Expanded View Figures

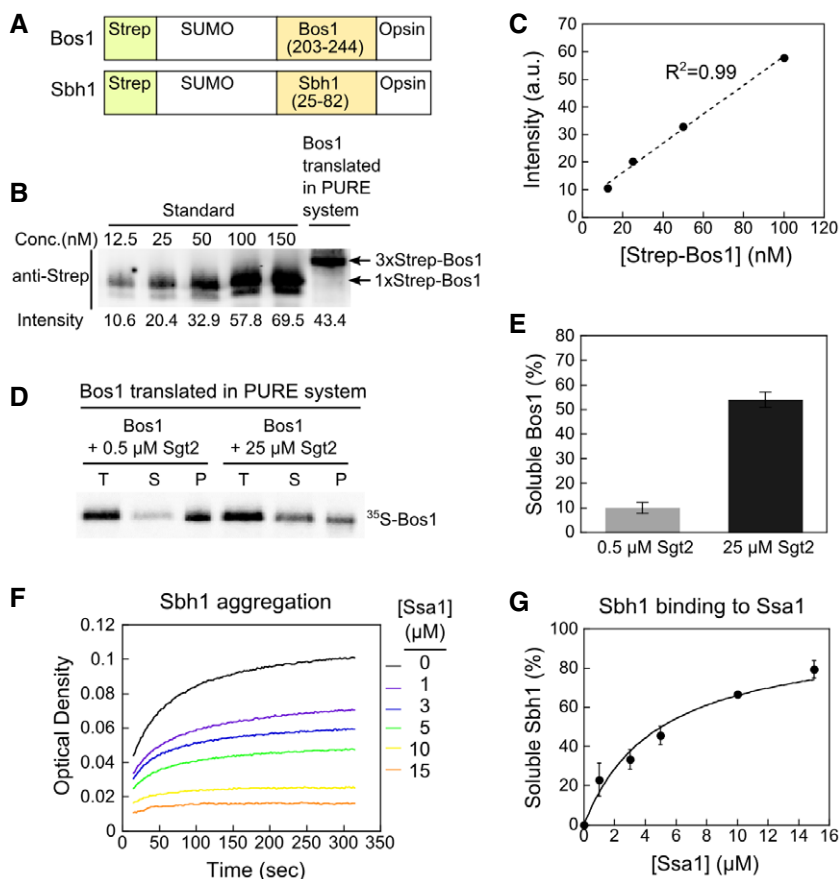

**Figure EV1. Sgt2 prevents TA aggregation only at super-physiological concentrations.**

**A** Schematic of the model TA substrates used in *in vitro* assays. A Strep-tagged non-cleavable SUMO protein was fused to Bos1 residues 203–244 or Sbh1 residues 25–82 that encompasses their targeting sequence, which includes an N-terminal linker to the cytosolic domain, the TMD, and the C-terminal sequence element that regulates insertion into the ER (Rao *et al.*, 2016). An opsin tag was attached to C-terminus of model TAs. For IVT, a 3xStrep tag was fused to SUMO in Bos1 instead of 1xStrep tag.

**B, C** Quantitative Western blot analysis of Bos1 synthesized in the PURE-IVT system. Known amounts of purified Strep-Bos1 were used to construct a standard curve (panel B) for quantification of the concentration of 3xStrep-Bos1 translated in the PURE system. Proteins were detected with a secondary antibody labeled with a near-infrared fluorescent dye, IRDye. The 3xStrep-Bos1 synthesized in PURE-IVT was 71 nM, which is sub-stoichiometric to the chaperones used in this work.

**D, E** Sedimentation analysis of <sup>35</sup>S-labeled Bos1 synthesized by PURE-IVT supplemented with 0.5 μM or 25 μM Sgt2. After ultracentrifugation, total input (T), soluble (S), and pellet (P) fractions were resolved by SDS-PAGE and visualized by autoradiography. The quantification of soluble Bos1 at indicated Sgt2 concentrations is shown in (E). All values are mean ± SD, with  $n \geq 3$ .

**F, G** Ssa1 suppresses Sbh1 aggregation in a dose-dependent manner in the turbidity assay. Panel (G) shows the quantification of the data in (F) and replicates. The line was a fit of the data to equation (1) and gave a  $K_{soluble}$  value of  $4.8 \pm 0.9 \mu\text{M}$ . All values are reported as mean ± SD, with  $n = 2$ .

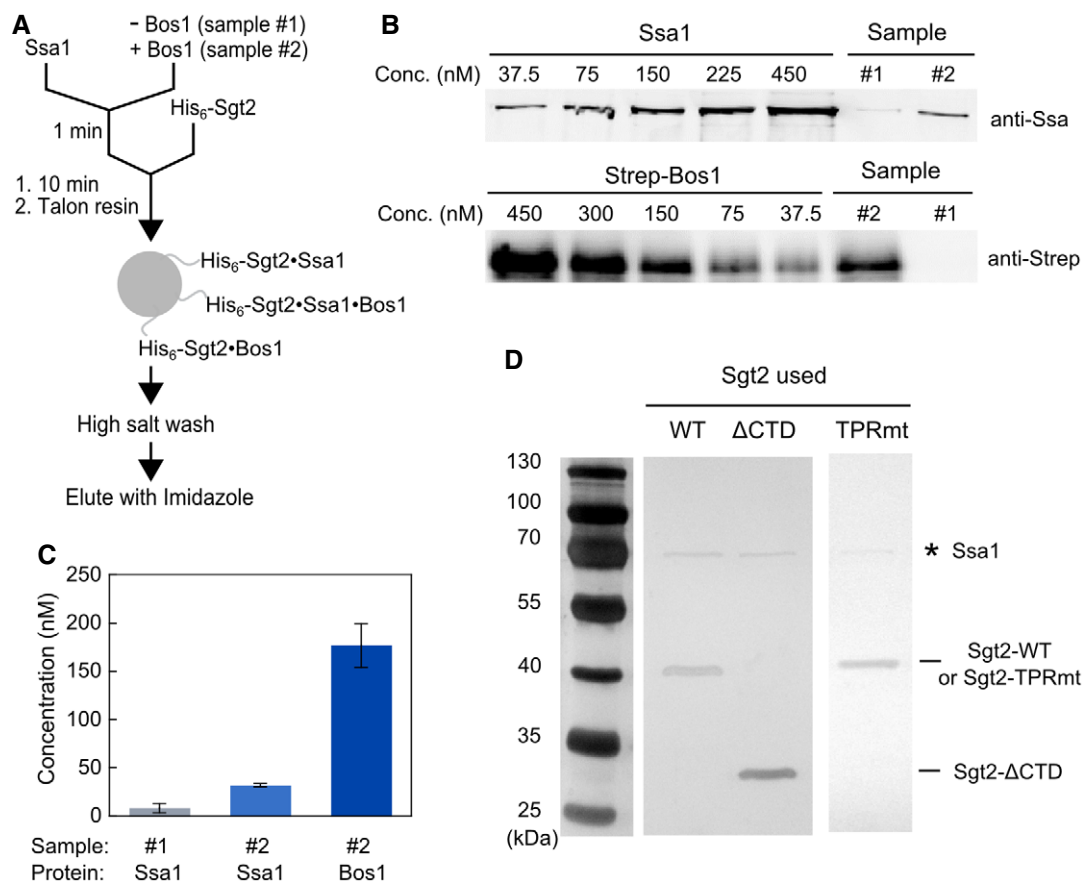

**Figure EV2. Ssa1 that co-purified with Sgt2 in the His<sub>6</sub>-pull-down assay accounted for < 17% of Sgt2-associated TA.**

- A Scheme of the His<sub>6</sub>-Sgt2 pull-down assay to monitor TA loading onto Sgt2 used for the experiments in Fig 4C. 5  $\mu$ M Ssa1 and 2 mM ATP were pre-incubated in the absence (sample #1) or presence (sample #2) of 300 nM Strep-Bos1 for 1 min, and further incubated for 10 min after addition of 500 nM His<sub>6</sub>-Sgt2. The mixture was incubated with Talon resin at 4°C for 10 min. All three possible complexes that can be immobilized on the resin via His<sub>6</sub>-Sgt2 are depicted. After washing the resin with high-salt (500 mM NaCl) buffer, bound proteins were eluted with 300 mM imidazole.
- B Quantitative Western blot analysis of the amount of Ssa1 and Bos1 in the elution fractions from samples #1 and #2 in (A), using known concentrations of purified Ssa1 and strep-Bos1. Proteins were detected with their corresponding secondary antibodies labeled with IRDye.
- C Quantified concentrations of Ssa1 and Bos1 that co-purified with Sgt2 in the elution fractions: 8.2 nM Ssa1 in the absence of Bos1 (sample #1), and 32 nM Ssa1 and 180 nM Bos1 in the presence of Bos1 (sample #2). Values are reported as mean  $\pm$  SD, with  $n \geq 2$ .
- D Silver-stained images of Sgt2-TA complexes reconstituted and purified as in panel (A) for wild-type and mutant Sgt2. \* denotes the Ssa1 band. Note that this gel was overdeveloped to visualize the presence of Ssa1.

Source data are available online for this figure.

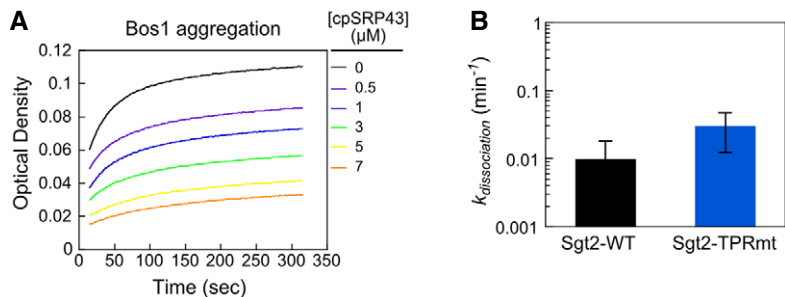

**Figure EV3.** cpSRP43 can serve as a trap for TA proteins.

**A** cpSRP43 prevents Bos1 aggregation in a dose-dependent manner, as analyzed by the turbidity assay.

**B** The intrinsic dissociation rate constants of Bos1 from the Sgt2-WT-Bos1 and Sgt2-TPRmt-Bos1 complexes reconstituted via IVT in *E. coli* extract. Bos1<sup>CM</sup> was translated in the *E. coli* S30 translation extract coupled to amber suppression, which co-translationally incorporates the non-natural fluorescent amino acid L-(7-hydroxycoumarin-4-yl)ethylglycine (CM) into Bos1 near the TMD, in the presence of 2 μM His<sub>6</sub>-Sgt2-WT<sup>BFL</sup> or His<sub>6</sub>-Sgt2-TPRmt<sup>BFL</sup>, as described in (Rao *et al.*, 2016). The resulting His<sub>6</sub>-Sgt2-WT<sup>BFL</sup>-Bos1<sup>CM</sup> or His<sub>6</sub>-Sgt2-TPRmt<sup>BFL</sup>-Bos1<sup>CM</sup> complexes were purified using metal affinity resin (Rao *et al.*, 2016). Bos1<sup>CM</sup> release from Sgt2-WT<sup>BFL</sup> or Sgt2-TPRmt<sup>BFL</sup> was measured as outlined in Fig 4E. Values are mean ± SEM, with *n* = 2.

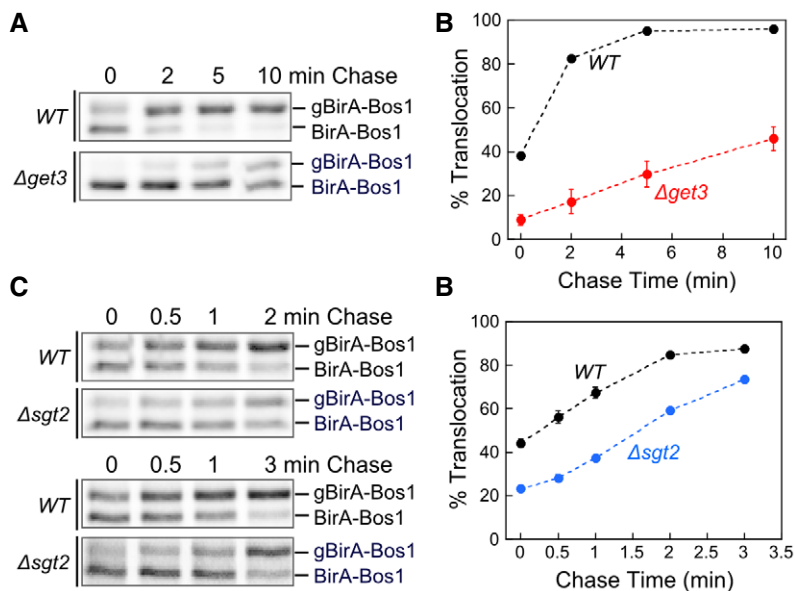

**Figure EV4.** BirA-Bos1 was inserted into the ER membrane in a GET-dependent manner.

**A** Representative autoradiograms for pulse-chase analysis of the translocation of metabolically labeled BirA-Bos1 in WT (black) and Δget3 (red) cells.

**B** Quantification of the data in (A) and replicates.

**C** Representative autoradiograms for pulse-chase analysis of the translocation of metabolically labeled BirA-Bos1 in WT (black) and Δsgt2 (blue) cells.

**D** Quantification of the data in (C) and replicates.

Data information: Values in (B) and (D) are mean ± SD, with *n* = 2 (biological replicates). Error bars are shown but may not be visible in some cases.

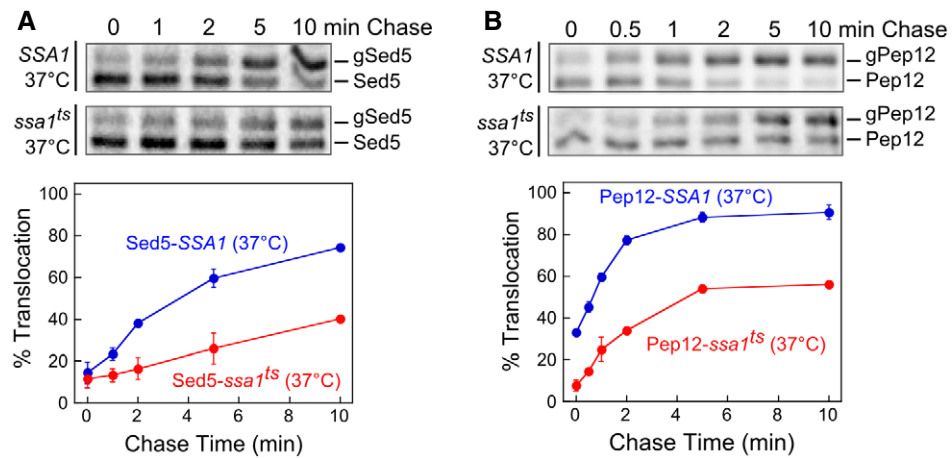

**Figure EV5. Ssa1 facilitates the targeting of multiple GET-dependent TAs to the ER.**

A, B The top panels show representative autoradiograms for pulse-chase analysis of the translocation of metabolically labeled Sed5 (A) and Pep12 (B) in SSA1 (blue) and *ssa1<sup>ts</sup>* (red) cells at 37°C. The bottom panels show the quantifications of translocation efficiencies at indicated time points. All values are mean  $\pm$  SD, with  $n = 2$  (biological replicates). Error bars are shown but may not be visible in some cases.
